# Supplementary material for: Gene-Specific Differential DNA Methylation and Chronic Arsenic Exposure in an Epigenome-Wide Association Study of Adults in Bangladesh
Source: PubMed Central journal article supplement (PMC4286273; doi:10.1289/ehp.1307884), 2014-10-17
Supplement: ehp.1307884.s001.508.pdf [file ehp.1307884.s001.508.pdf]

**Supplemental Material**

**Gene-Specific Differential DNA Methylation and Chronic Arsenic Exposure in an  
Epigenome-Wide Association Study of Adults in Bangladesh**

Maria Argos, Lin Chen, Farzana Jasmine, Lin Tong, Brandon L. Pierce, Shantanu Roy, Rachelle Paul-Brutus, Mary V. Gamble, Kristin N. Harper, Faruque Parvez, Mahfuzar Rahman, Muhammad Rakibuz-Zaman, Vesna Slavkovich, John A. Baron, Joseph H. Graziano, Muhammad G. Kibriya, and Habibul Ahsan

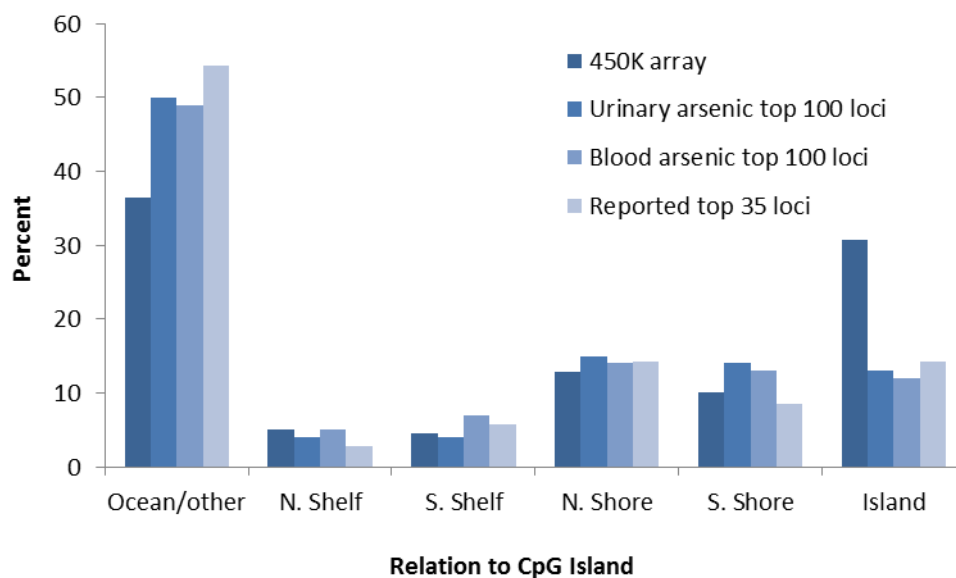

**Figure S1.** Distribution of methylation probes in relation to CpG functional regions for the 450K array, top 100 differentially methylated loci in relation to blood and urinary total arsenic concentrations, as well as reported top 35 loci. The distribution of CpG functional regions for the top 100 differentially methylated loci in relation to urinary total ( $P=0.0038$ ) and blood ( $P=0.0030$ ) arsenic concentrations were statistically different than the overall distribution of functional regions on the array. Functional regions were classified as ocean/other (isolated CpG loci in the genome), shelf (2-4 kb from a CpG island), shore (within 2 kb of a CpG island), and island (region >200 bp in length and GC% >50%).

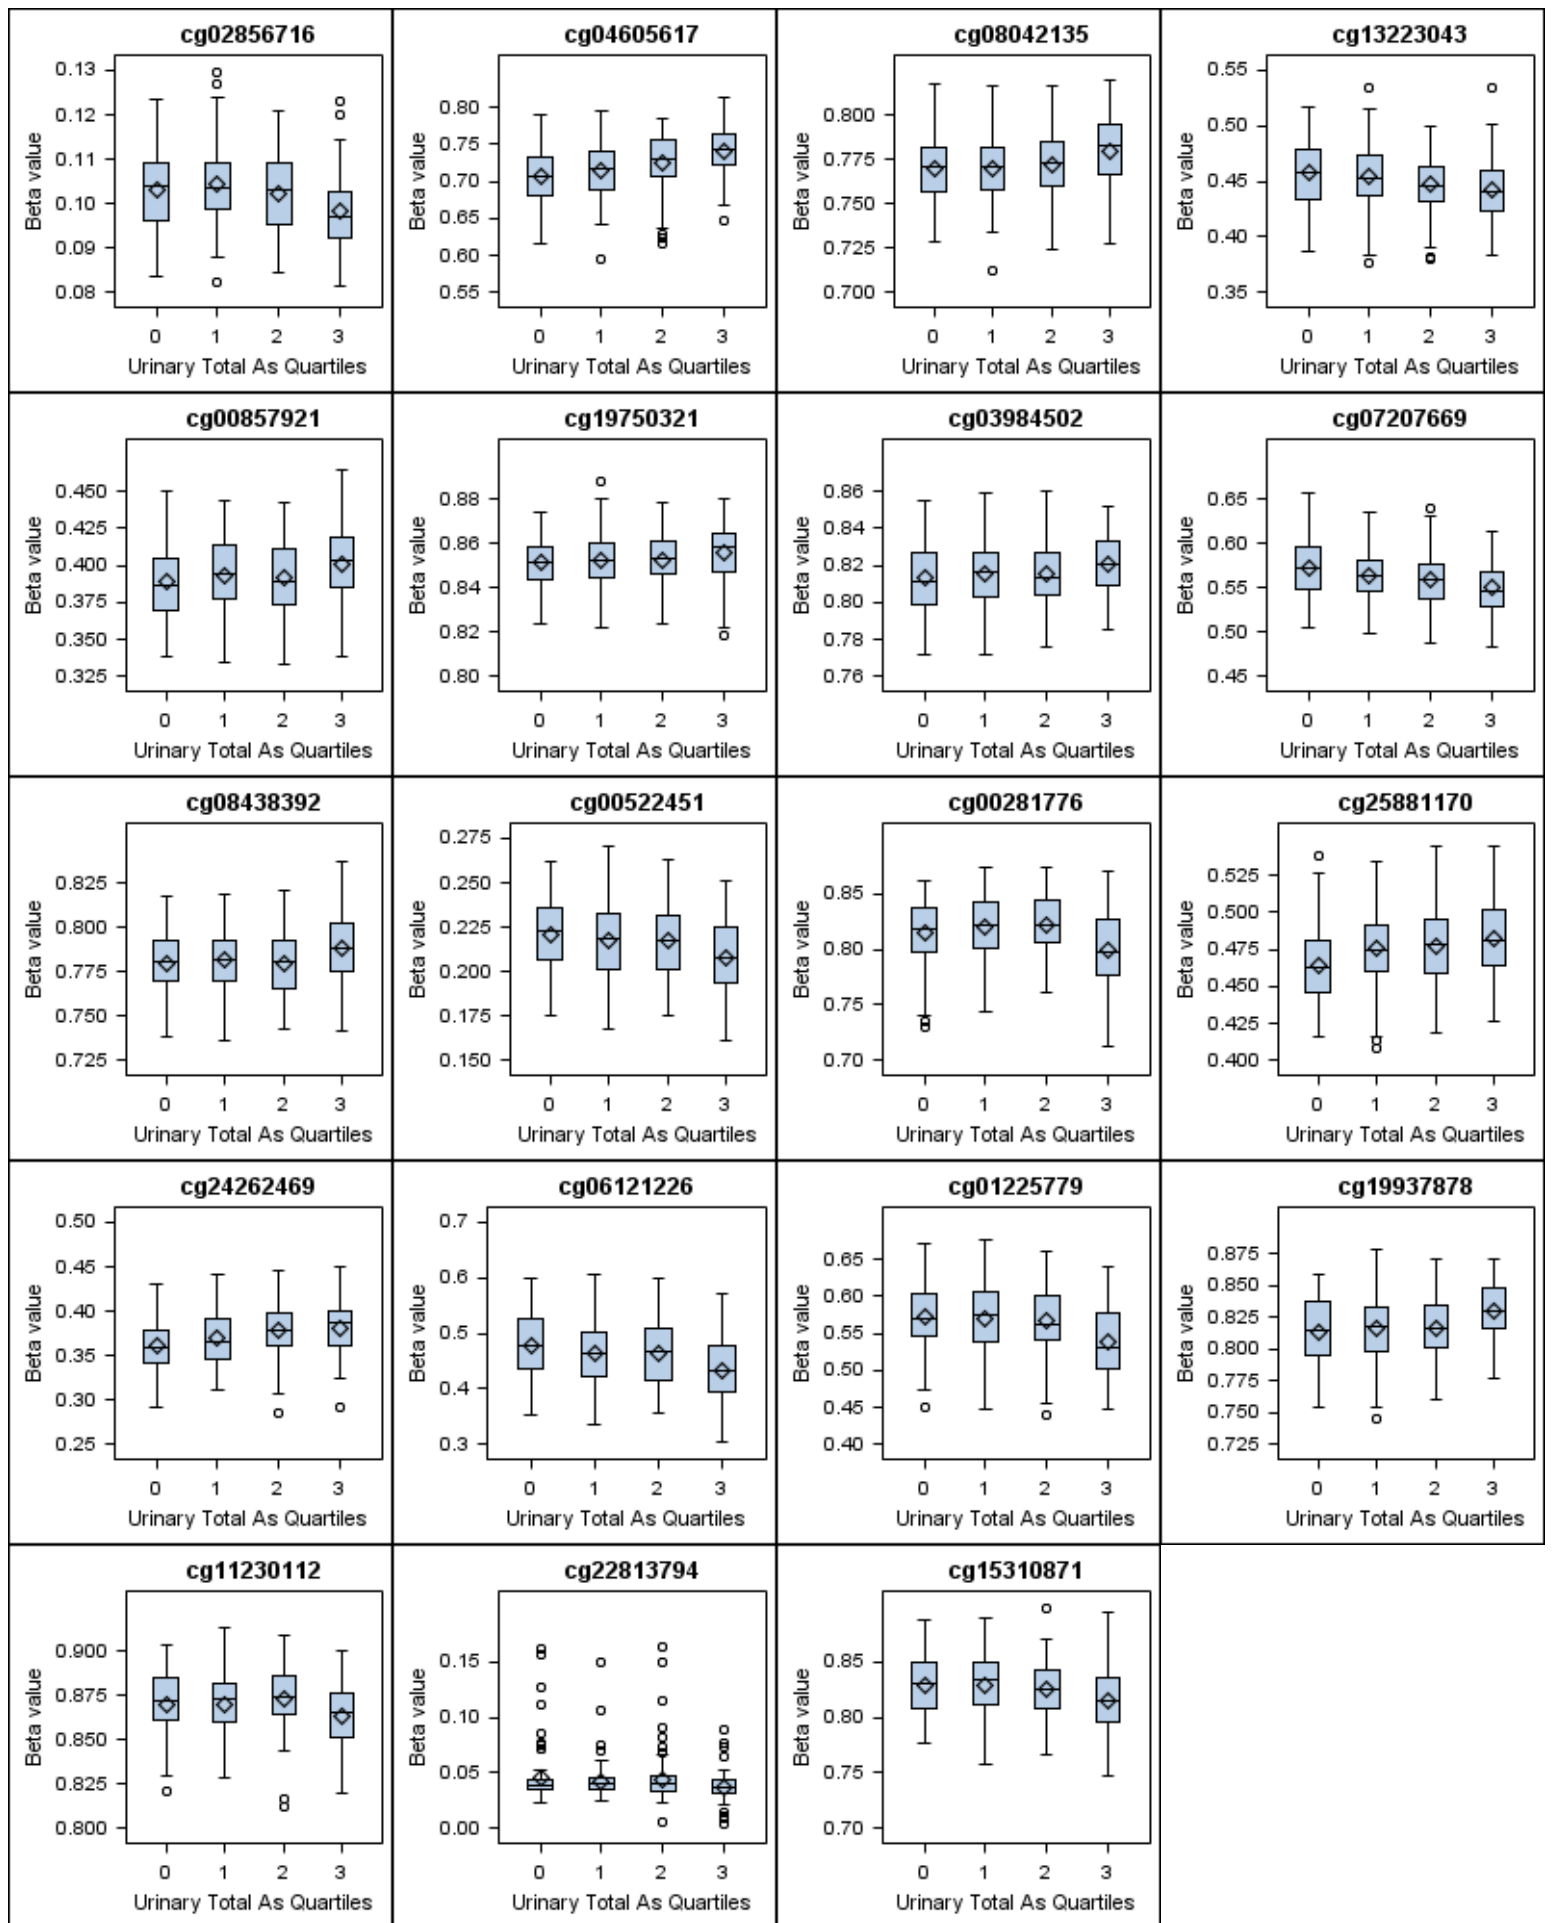

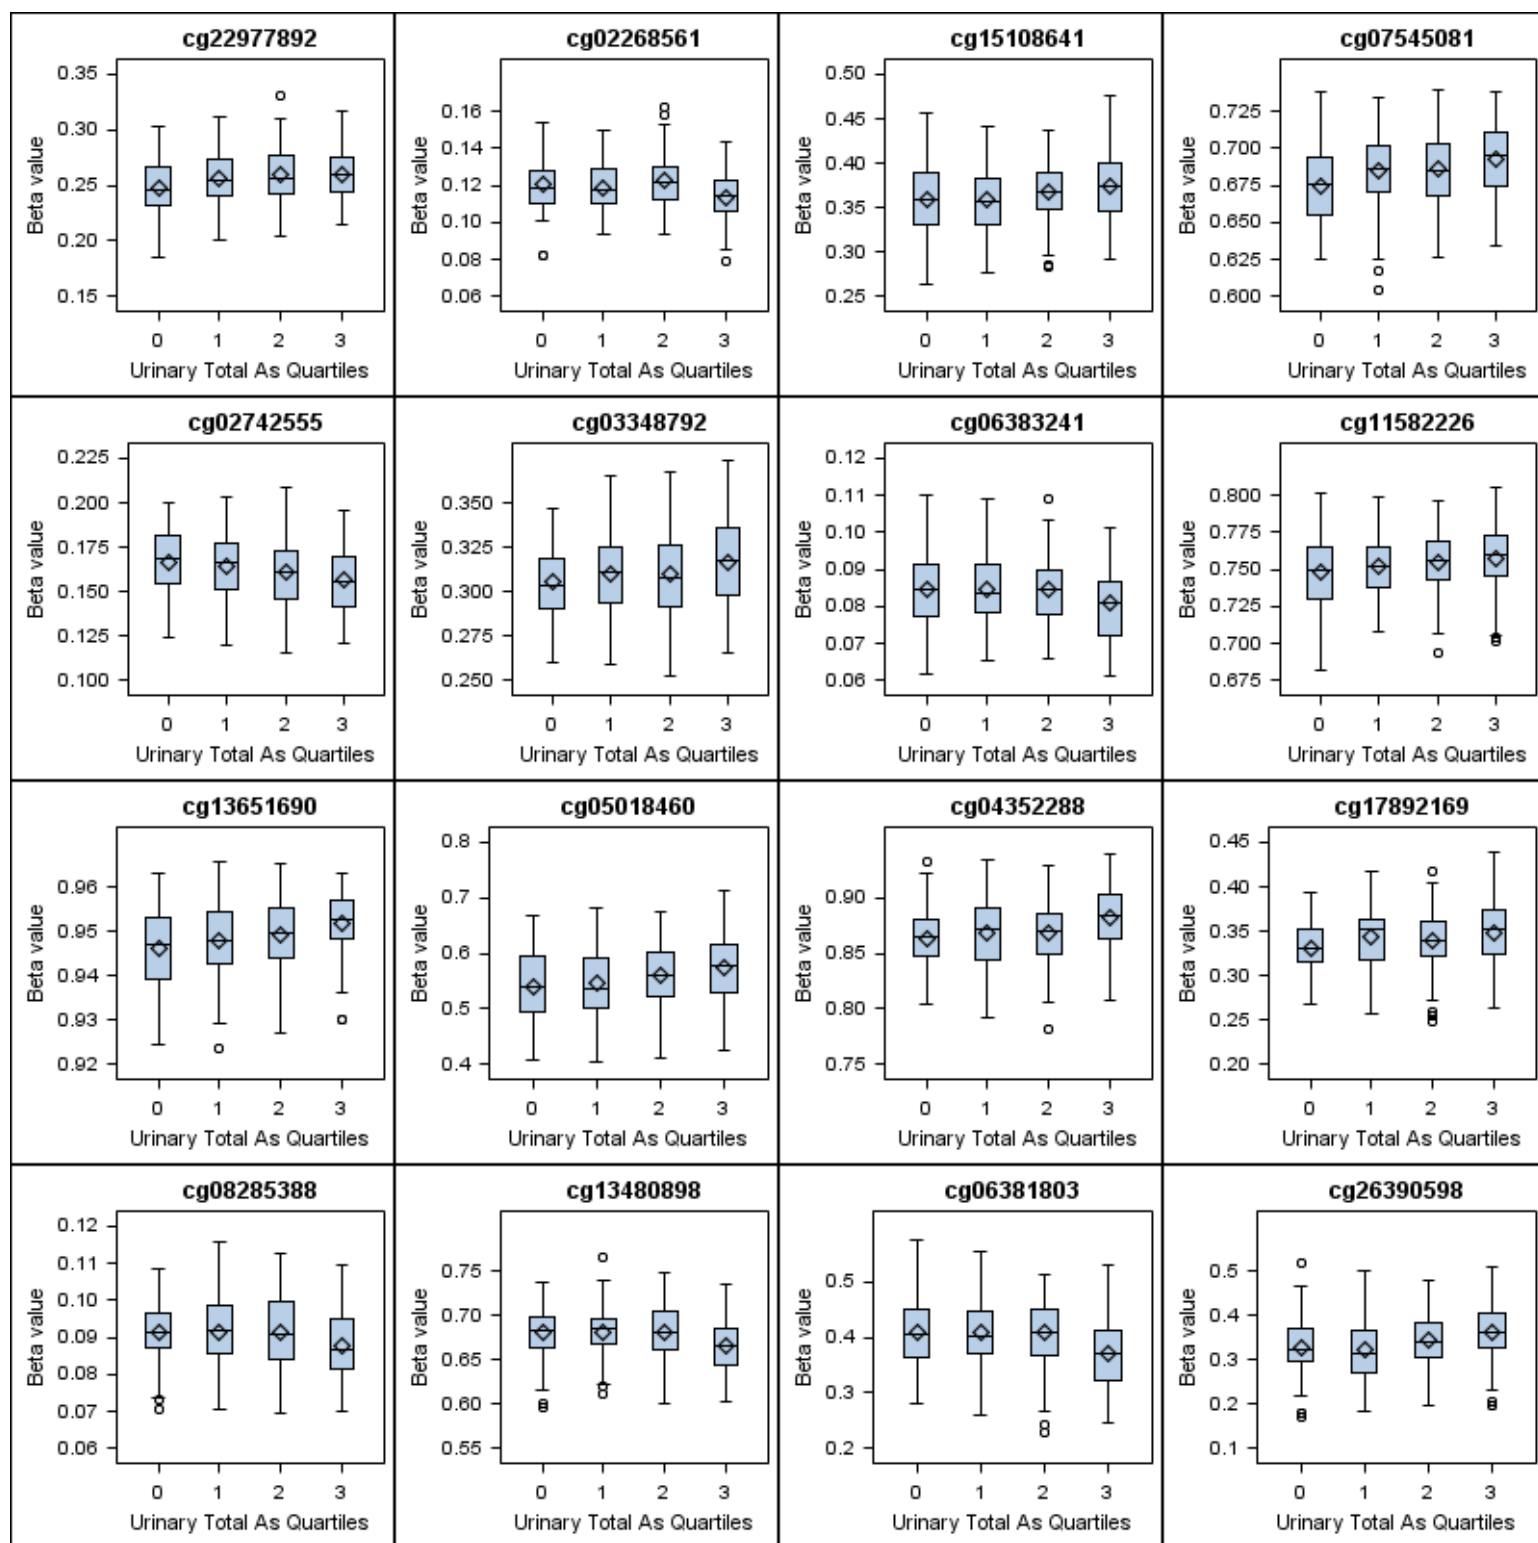

**Figure S2.** Boxplots of methylation  $\beta$  values by creatinine-adjusted urinary total arsenic concentration quartiles. The mean is depicted by the diamond, the median is depicted by the horizontal line in the box interior, the interquartile range (IQR) is represented by the length of the box, the lowest and highest data points within 1.5 IQR is depicted by the whiskers, and outlying values are depicted by the open circles.

**Table S1.** Lookup of 35 differentially methylation sites in arsenic-exposed replication sample.

| Probe      | Gene                   | P value | Low arsenic group average $\beta$ value | High arsenic group average $\beta$ value |
|------------|------------------------|---------|-----------------------------------------|------------------------------------------|
| cg13651690 | <i>IGH</i>             | 0.0054* | 0.932                                   | 0.945                                    |
| cg02742555 | <i>INSC</i>            | 0.0059* | 0.145                                   | 0.128                                    |
| cg24262469 | <i>TIPARP-AS1</i>      | 0.0128* | 0.237                                   | 0.216                                    |
| cg07207669 | <i>EFNA1</i>           | 0.0135* | 0.550                                   | 0.529                                    |
| cg17892169 | <i>TNFSF12-TNFSF13</i> | 0.0180* | 0.251                                   | 0.232                                    |
| cg03348792 | <i>KRT1</i>            | 0.0287* | 0.231                                   | 0.216                                    |
| cg06381803 | <i>EML2</i>            | 0.0327* | 0.488                                   | 0.451                                    |
| cg26390598 | <i>B3GALT5</i>         | 0.0440* | 0.311                                   | 0.337                                    |
| cg11230112 | <i>SYNJ2</i>           | 0.0745  | 0.910                                   | 0.919                                    |
| cg00522451 | <i>SLC20A1  NT5DC4</i> | 0.0844  | 0.142                                   | 0.134                                    |
| cg02856716 | <i>PAX7</i>            | 0.0949  | 0.082                                   | 0.077                                    |
| cg00857921 | <i>TGFBR3</i>          | 0.1325  | 0.348                                   | 0.336                                    |
| cg01225779 | <i>SQSTM1</i>          | 0.1358  | 0.784                                   | 0.806                                    |
| cg08285388 | <i>DHRS13</i>          | 0.1540  | 0.074                                   | 0.071                                    |
| cg11582226 | <i>FBXL3</i>           | 0.1709  | 0.763                                   | 0.749                                    |
| cg06383241 | <i>MAP1LC3B2</i>       | 0.2035  | 0.059                                   | 0.057                                    |
| cg22977892 | <i>PPP2R2A</i>         | 0.2238  | 0.205                                   | 0.199                                    |
| cg08042135 | <i>PLA2G2C</i>         | 0.2323  | 0.756                                   | 0.764                                    |
| cg08438392 | <i>IFT172</i>          | 0.4044  | 0.738                                   | 0.731                                    |
| cg02268561 | <i>NMT2</i>            | 0.5154  | 0.113                                   | 0.111                                    |
| cg13223043 | <i>FAM110D  ZNF593</i> | 0.5233  | 0.520                                   | 0.526                                    |
| cg00281776 | <i>PIKFYVE  PTH2R</i>  | 0.5740  | 0.892                                   | 0.893                                    |
| cg07545081 | <i>FAM53B</i>          | 0.5755  | 0.640                                   | 0.635                                    |
| cg04352288 | <i>CA5A</i>            | 0.7756  | 0.776                                   | 0.769                                    |
| cg25881170 | <i>CD47</i>            | 0.8251  | 0.464                                   | 0.464                                    |
| cg04605617 | <i>PLA2G2C</i>         | 0.8464  | 0.734                                   | 0.732                                    |
| cg03984502 | <i>RORC</i>            | 0.9052  | 0.750                                   | 0.746                                    |
| cg19750321 | <i>ARNT</i>            | 0.9205  | 0.850                                   | 0.847                                    |
| cg13480898 | <i>C19orf66</i>        | 0.9582  | 0.755                                   | 0.753                                    |
| cg05018460 | <i>AB240015  ARNT2</i> | NA      |                                         |                                          |
| cg06121226 | <i>SLC4A4</i>          | NA      |                                         |                                          |
| cg15108641 | <i>UBTD1</i>           | NA      |                                         |                                          |
| cg15310871 | <i>ATP6V1B2</i>        | NA      |                                         |                                          |
| cg19937878 | <i>TBC1D7</i>          | NA      |                                         |                                          |
| cg22813794 | <i>MDH2</i>            | NA      |                                         |                                          |

NA indicates that data was not available after quality control processing for the probe in the replication dataset.

\* P<0.05.

**Table S2.** Lookup of previously reported DNA methylation sites from epigenome-wide studies in relation to arsenic exposure or arsenical skin lesion status with P values reported from the Bangladesh dataset.

| <b>Methylation probe</b> | <b>P value - urinary As</b> | <b>P value - blood As</b> |
|--------------------------|-----------------------------|---------------------------|
| <b>Seow et al. 2014</b>  |                             |                           |
| cg11511175               | 0.0560                      | 0.0458*                   |
| cg03333116               | 0.0770                      | 0.0113*                   |
| cg27370573               | 0.0972                      | 0.1476                    |
| cg03371700               | 0.1179                      | 0.7077                    |
| cg17900076               | 0.1850                      | 0.1112                    |
| cg00028056               | 0.3133                      | 0.2947                    |
| cg01667892               | 0.3714                      | 0.2730                    |
| cg19296405               | 0.3730                      | 0.6214                    |
| cg25148456               | 0.4211                      | 0.1370                    |
| cg10090568               | 0.4728                      | 0.1994                    |
| cg00218770               | 0.4831                      | 0.4419                    |
| cg24883732               | 0.5144                      | 0.5834                    |
| cg02916425               | 0.6287                      | 0.7410                    |
| cg24405174               | 0.6412                      | 0.3057                    |
| cg06352616               | 0.6430                      | 0.9336                    |
| cg02749948               | 0.6604                      | 0.9000                    |
| cg07664579               | 0.6644                      | 0.8212                    |
| cg22217449               | 0.7178                      | 0.8952                    |
| cg03065888               | 0.7507                      | 0.5124                    |
| cg15059639               | 0.7913                      | 0.9954                    |
| <b>Kile et al. 2014</b>  |                             |                           |
| cg15641060               | 0.1705                      | 0.2644                    |
| cg01783894               | 0.3637                      | 0.1095                    |
| cg00122779               | 0.3655                      | 0.2422                    |
| cg02095504               | 0.6517                      | 0.5919                    |
| cg04597393               | 0.7367                      | 0.4057                    |
| cg16321474               | 0.8562                      | 0.6435                    |
| cg03783410               | 0.9325                      | 0.8977                    |
| cg15346830               | 0.9563                      | 0.8696                    |
| cg00498691               | 0.9637                      | 0.5760                    |
| cg06448705               | 0.9730                      | 0.4863                    |
| <b>Liu et al. 2014</b>   |                             |                           |
| cg22489759               | 0.0425*                     | 0.0478*                   |
| cg00088989               | 0.0478*                     | 0.0590                    |
| cg02276490               | 0.0741                      | 0.0792                    |
| cg06722407               | 0.1598                      | 0.1763                    |
| cg23417171               | 0.2255                      | 0.0753                    |
| cg17428496               | 0.2452                      | 0.1994                    |
| cg04690840               | 0.3277                      | 0.2535                    |
| cg10389982               | 0.4854                      | 0.4721                    |
| cg23997365               | 0.4978                      | 0.5059                    |

| <b>Methylation probe</b>    | <b>P value - urinary As</b> | <b>P value - blood As</b> |
|-----------------------------|-----------------------------|---------------------------|
| cg13611173                  | 0.5054                      | 0.5399                    |
| cg02824793                  | 0.5713                      | 0.8318                    |
| cg16793757                  | 0.6398                      | 0.7571                    |
| cg07604512                  | 0.6877                      | 0.9465                    |
| cg05622915                  | 0.7005                      | 0.6793                    |
| cg01040960                  | 0.7181                      | 0.4793                    |
| cg20682143                  | 0.7809                      | 0.2525                    |
| cg13311357                  | 0.8193                      | 0.9853                    |
| cg06696800                  | 0.8558                      | 0.7244                    |
| cg10014338                  | 0.9419                      | 0.7695                    |
| cg07175191                  | 0.9609                      | 0.8908                    |
| cg05651282                  | 0.9821                      | 0.7704                    |
| cg25417223                  | -                           |                           |
| <b>Yang et al. 2014</b>     |                             |                           |
| cg27504805                  | 0.0529                      | 0.0625                    |
| cg10887021                  | 0.0781                      | 0.2246                    |
| cg01936270                  | 0.2104                      | 0.3252                    |
| cg16306115                  | 0.2294                      | 0.0891                    |
| cg19953406                  | 0.3312                      | 0.5677                    |
| cg13877915                  | 0.3781                      | 0.1402                    |
| cg08315770                  | 0.4447                      | 0.4901                    |
| cg20723355                  | 0.6429                      | 0.7251                    |
| cg16319578                  | 0.7848                      | 0.5679                    |
| cg07748540                  | 0.9573                      | 0.9945                    |
| cg08107272                  | -                           |                           |
| <b>Koestler et al. 2014</b> |                             |                           |
| cg03512414                  | 0.0022*                     | 0.0228*                   |
| cg11293029                  | 0.0049*                     | 0.0168*                   |
| cg09051215                  | 0.0126*                     | 0.0085*                   |
| cg01717164                  | 0.0418*                     | 0.0927                    |
| cg14993464                  | 0.0818                      | 0.1659                    |
| cg10729419                  | 0.1372                      | 0.4201                    |
| cg03840511                  | 0.1589                      | 0.4592                    |
| cg08120511                  | 0.1632                      | 0.1136                    |
| cg01410578                  | 0.1935                      | 0.1422                    |
| cg11793106                  | 0.2486                      | 0.2766                    |
| cg04248979                  | 0.3137                      | 0.4418                    |
| cg16817180                  | 0.3139                      | 0.7668                    |
| cg27514608                  | 0.3165                      | 0.9913                    |
| cg08884395                  | 0.3558                      | 0.6197                    |
| cg03887163                  | 0.3918                      | 0.7125                    |
| cg12117986                  | 0.4062                      | 0.4212                    |
| cg17519101                  | 0.4560                      | 0.3751                    |
| cg15156029                  | 0.5481                      | 0.5601                    |
| cg18003231                  | 0.5547                      | 0.6207                    |
| cg09417038                  | 0.5834                      | 0.7371                    |

| <b>Methylation probe</b> | <b>P value - urinary As</b> | <b>P value - blood As</b> |
|--------------------------|-----------------------------|---------------------------|
| cg15091868               | 0.6461                      | 0.7908                    |
| cg18151270               | 0.6819                      | 0.9562                    |
| cg18535167               | 0.7036                      | 0.8198                    |
| cg19270089               | 0.8101                      | 0.9213                    |
| cg12513505               | 0.8283                      | 0.8268                    |
| cg19213675               | 0.8655                      | 0.8350                    |
| cg14185717               | 0.9611                      | 0.7834                    |
| cg13495373               | 0.9703                      | 0.6504                    |
| cg05423713               | 0.9789                      | 0.5479                    |
| cg15206445               | 0.9997                      | 0.4463                    |

\* P<0.05.



**Table S3.** Lookup of previously reported DNA methylation sites from candidate studies in relation to arsenic exposure with P values reported from the Bangladesh dataset.

| <b>Gene, methylation probe</b> | <b>P value - urinary As</b> | <b>P value - blood As</b> |
|--------------------------------|-----------------------------|---------------------------|
| <b><i>DAPK1</i></b>            |                             |                           |
| cg17090012                     | 0.0370*                     | 0.0979                    |
| cg02100497                     | 0.1908                      | 0.1420                    |
| cg13778339                     | 0.2537                      | 0.1461                    |
| cg13805297                     | 0.2147                      | 0.1702                    |
| cg22571217                     | 0.3668                      | 0.2224                    |
| cg14134019                     | 0.1571                      | 0.2434                    |
| cg14159523                     | 0.4690                      | 0.3148                    |
| cg17984409                     | 0.3122                      | 0.3234                    |
| cg05475556                     | 0.5625                      | 0.3677                    |
| cg14089032                     | 0.8991                      | 0.4448                    |
| cg14071249                     | 0.8467                      | 0.4746                    |
| cg24754277                     | 0.4686                      | 0.4959                    |
| cg13765778                     | 0.5448                      | 0.5007                    |
| cg08797471                     | 0.2886                      | 0.5015                    |
| cg13814950                     | 0.9827                      | 0.5801                    |
| cg01463032                     | 0.7796                      | 0.5899                    |
| cg14286732                     | 0.6062                      | 0.6924                    |
| cg15746719                     | 0.7287                      | 0.7231                    |
| cg19734228                     | 0.6378                      | 0.7364                    |
| cg08719486                     | 0.6077                      | 0.7566                    |
| cg14014720                     | 0.5874                      | 0.8404                    |
| cg13527872                     | 0.3511                      | 0.8854                    |
| cg13823120                     | 0.7872                      | 0.9310                    |
| cg20401521                     | 0.7632                      | 0.9609                    |
| cg13964439                     | 0.9312                      | 0.9644                    |
| cg13932603                     | 0.9672                      | 0.9870                    |
| cg14250336                     | 0.8171                      | 0.9904                    |
| cg13752933                     | 0.5810                      | 0.9914                    |
| cg21180703                     | 0.7910                      | 0.9924                    |
| <b><i>CDKN2A (P16)</i></b>     |                             |                           |
| cg03079681                     | 0.0008*                     | 0.0132*                   |
| cg04026675                     | 0.2179                      | 0.2687                    |
| cg12840719                     | 0.9100                      | 0.6441                    |
| cg13601799                     | 0.9675                      | 0.9298                    |
| cg07562918                     | 0.7633                      | 0.9833                    |
| <b><i>GMDS</i></b>             |                             |                           |
| cg11608390                     | 0.0806                      | 0.0366*                   |
| cg21499610                     | 0.2235                      | 0.0396*                   |
| cg01813738                     | 0.0716                      | 0.0479*                   |
| cg02145137                     | 0.0595                      | 0.0481*                   |
| cg25049733                     | 0.0528                      | 0.0498*                   |
| cg12303981                     | 0.0792                      | 0.0672                    |
| cg08804626                     | 0.1328                      | 0.0943                    |

| <b>Gene, methylation probe</b> | <b>P value - urinary As</b> | <b>P value - blood As</b> |
|--------------------------------|-----------------------------|---------------------------|
| cg17346428                     | 0.2046                      | 0.0965                    |
| cg00971613                     | 0.1595                      | 0.1026                    |
| cg09571972                     | 0.0650                      | 0.1162                    |
| cg18132076                     | 0.0516                      | 0.1196                    |
| cg19466906                     | 0.0860                      | 0.1324                    |
| cg12872692                     | 0.2460                      | 0.1390                    |
| cg07714812                     | 0.1390                      | 0.1633                    |
| cg07515565                     | 0.2734                      | 0.1829                    |
| cg09510246                     | 0.7725                      | 0.1882                    |
| cg21500247                     | 0.1936                      | 0.2258                    |
| cg20203534                     | 0.1300                      | 0.2355                    |
| cg16762849                     | 0.2874                      | 0.2412                    |
| cg17697739                     | 0.3951                      | 0.2501                    |
| cg26272879                     | 0.5636                      | 0.2827                    |
| cg17032507                     | 0.4107                      | 0.2851                    |
| cg04661959                     | 0.5379                      | 0.2987                    |
| cg11786839                     | 0.0889                      | 0.3093                    |
| cg22994582                     | 0.1579                      | 0.3324                    |
| cg19295314                     | 0.3142                      | 0.3337                    |
| cg06960457                     | 0.3607                      | 0.3433                    |
| cg01588725                     | 0.8239                      | 0.3436                    |
| cg09376855                     | 0.7196                      | 0.3545                    |
| cg14393923                     | 0.1079                      | 0.3565                    |
| cg09974772                     | 0.7716                      | 0.3570                    |
| cg08513472                     | 0.8242                      | 0.3702                    |
| cg26807095                     | 0.2414                      | 0.3723                    |
| cg06080793                     | 0.7251                      | 0.3805                    |
| cg25697442                     | 0.7983                      | 0.4033                    |
| cg10716548                     | 0.8507                      | 0.4095                    |
| cg07972026                     | 0.5995                      | 0.4377                    |
| cg13394216                     | 0.6946                      | 0.4445                    |
| cg27205941                     | 0.8890                      | 0.4517                    |
| cg01708377                     | 0.2027                      | 0.4637                    |
| cg27215185                     | 0.9251                      | 0.4707                    |
| cg12734024                     | 0.1807                      | 0.4934                    |
| cg01496600                     | 0.7429                      | 0.5004                    |
| cg25320587                     | 0.9907                      | 0.5035                    |
| cg03118021                     | 0.0770                      | 0.5636                    |
| cg20384898                     | 0.3633                      | 0.5671                    |
| cg21478123                     | 0.2060                      | 0.5672                    |
| cg11276500                     | 0.4373                      | 0.5855                    |
| cg19828338                     | 0.2774                      | 0.5892                    |
| cg27095915                     | 0.8543                      | 0.6004                    |
| cg23229309                     | 0.9680                      | 0.6213                    |
| cg21682057                     | 0.7104                      | 0.6258                    |
| cg14358088                     | 0.8666                      | 0.6577                    |

| Gene, methylation probe | P value - urinary As | P value - blood As |
|-------------------------|----------------------|--------------------|
| cg03878537              | 0.1847               | 0.6615             |
| cg01588060              | 0.7129               | 0.6801             |
| cg27478313              | 0.9544               | 0.6846             |
| cg17305617              | 0.3710               | 0.6891             |
| cg00741954              | 0.5353               | 0.6950             |
| cg18434348              | 0.2938               | 0.7087             |
| cg10707788              | 0.9631               | 0.7098             |
| cg23120243              | 0.4949               | 0.7125             |
| cg01465824              | 0.3533               | 0.7131             |
| cg05996341              | 0.5491               | 0.7245             |
| cg02926797              | 0.9385               | 0.7344             |
| cg07329532              | 0.3384               | 0.7354             |
| cg18551822              | 0.9435               | 0.7581             |
| cg02783314              | 0.7033               | 0.7610             |
| cg27294279              | 0.8620               | 0.7622             |
| cg08614769              | 0.5232               | 0.8011             |
| cg04695233              | 0.6279               | 0.8041             |
| cg09841915              | 0.7446               | 0.8179             |
| cg00750225              | 0.9950               | 0.8270             |
| cg08932320              | 0.8898               | 0.8318             |
| cg06315217              | 0.7806               | 0.8399             |
| cg21347053              | 0.7516               | 0.8410             |
| cg04497116              | 0.9329               | 0.8671             |
| cg25936567              | 0.6254               | 0.8698             |
| cg13253856              | 0.7632               | 0.8832             |
| cg23411150              | 0.6291               | 0.8876             |
| cg26546884              | 0.5457               | 0.8936             |
| cg09953908              | 0.4760               | 0.9087             |
| cg26908825              | 0.8852               | 0.9142             |
| cg03058444              | 0.8445               | 0.9384             |
| cg06007850              | 0.7844               | 0.9650             |
| cg16550324              | 0.8590               | 0.9860             |
| cg15193215              | 0.9744               | 0.9990             |
| cg16137006              | 0.9607               | 0.9998             |
| <b>C10ORF32/AS3MT</b>   |                      |                    |
| cg26626287              | 0.0062*              | 0.0348*            |
| cg08330031              | 0.0634               | 0.0591             |
| cg03769523              | 0.1797               | 0.1436             |
| cg03275084              | 0.2123               | 0.1478             |
| cg05959392              | 0.2507               | 0.1871             |
| cg18534077              | 0.3536               | 0.2923             |
| cg25193742              | 0.4954               | 0.3000             |
| cg11050480              | 0.5150               | 0.3335             |
| cg16330755              | 0.3420               | 0.4330             |
| cg15744005              | 0.0470*              | 0.4642             |
| cg26741530              | 0.3764               | 0.4689             |

| Gene, methylation probe | P value - urinary As | P value - blood As |
|-------------------------|----------------------|--------------------|
| cg00086670              | 0.5911               | 0.4876             |
| cg08668676              | 0.6251               | 0.5003             |
| cg25729957              | 0.7095               | 0.5020             |
| cg26207201              | 0.4438               | 0.5330             |
| cg10615065              | 0.6967               | 0.5407             |
| cg08757448              | 0.3751               | 0.5819             |
| cg16989281              | 0.9161               | 0.6056             |
| cg11784071              | 0.9523               | 0.6300             |
| cg17259809              | 0.8659               | 0.6629             |
| cg08856941              | 0.6048               | 0.6944             |
| cg24592962              | 0.7522               | 0.7134             |
| cg17255062              | 0.8004               | 0.7205             |
| cg14557236              | 0.8281               | 0.8502             |
| cg25143771              | 0.7107               | 0.8841             |
| cg02921697              | 0.8685               | 0.8976             |
| cg08772003              | 0.3159               | 0.9783             |
| <b>RASSF1</b>           |                      |                    |
| cg00980904              | 0.1300               | 0.0672             |
| cg12966367              | 0.1085               | 0.0754             |
| cg13257331              | 0.0846               | 0.0770             |
| cg03297783              | 0.3578               | 0.0836             |
| cg11035216              | 0.2434               | 0.1088             |
| cg22090713              | 0.1255               | 0.1126             |
| cg21372200              | 0.1556               | 0.1126             |
| cg25747192              | 0.1808               | 0.1184             |
| cg14884256              | 0.2169               | 0.1226             |
| cg08047457              | 0.4254               | 0.1269             |
| cg15426878              | 0.5147               | 0.1651             |
| cg13872831              | 0.1153               | 0.1863             |
| cg24049629              | 0.0744               | 0.2016             |
| cg00743929              | 0.2351               | 0.2329             |
| cg13497155              | 0.3221               | 0.2769             |
| cg21522636              | 0.0925               | 0.2797             |
| cg05885095              | 0.1271               | 0.2964             |
| cg21554552              | 0.2316               | 0.3047             |
| cg06980053              | 0.0557               | 0.3113             |
| cg06117233              | 0.0434*              | 0.3359             |
| cg07130266              | 0.7208               | 0.3499             |
| cg02930432              | 0.2504               | 0.3762             |
| cg23147362              | 0.3339               | 0.3791             |
| cg08078366              | 0.3144               | 0.3941             |
| cg20826201              | 0.2648               | 0.4280             |
| cg00777121              | 0.3784               | 0.4358             |
| cg26093954              | 0.2836               | 0.4612             |
| cg20119308              | 0.4708               | 0.4628             |
| cg21418575              | 0.8372               | 0.4640             |

| Gene, methylation probe | P value - urinary As | P value - blood As |
|-------------------------|----------------------|--------------------|
| cg09386807              | 0.7694               | 0.4648             |
| cg19854901              | 0.1657               | 0.4862             |
| cg19811994              | 0.6005               | 0.4903             |
| cg06174454              | 0.4935               | 0.4946             |
| cg26357744              | 0.6160               | 0.4973             |
| cg10152523              | 0.7893               | 0.5047             |
| cg06063729              | 0.5215               | 0.5054             |
| cg04743654              | 0.1130               | 0.5095             |
| cg24298409              | 0.8736               | 0.5218             |
| cg01932734              | 0.4221               | 0.5265             |
| cg19152024              | 0.7913               | 0.5354             |
| cg24859722              | 0.2440               | 0.5443             |
| cg27569446              | 0.6821               | 0.5876             |
| cg04540383              | 0.7993               | 0.5912             |
| cg21908110              | 0.3537               | 0.5916             |
| cg06375085              | 0.5298               | 0.5966             |
| cg06821120              | 0.6849               | 0.6007             |
| cg05989693              | 0.6200               | 0.6081             |
| cg22796393              | 0.4702               | 0.6136             |
| cg06172942              | 0.4831               | 0.6666             |
| cg27149285              | 0.8325               | 0.7480             |
| cg02817007              | 0.9225               | 0.8186             |
| cg01568433              | 0.7875               | 0.9121             |
| cg07344955              | 0.5774               | 0.9165             |
| cg15043975              | 0.7402               | 0.9616             |
| cg25486143              | 0.6806               | 0.9707             |
| cg05546296              | 0.9135               | 0.9918             |
| <b>PPARG</b>            |                      |                    |
| cg10499651              | 0.1310               | 0.0257*            |
| cg25929976              | 0.1009               | 0.1020             |
| cg18063278              | 0.3556               | 0.1674             |
| cg01412654              | 0.1835               | 0.1846             |
| cg16827534              | 0.2376               | 0.2556             |
| cg07556134              | 0.7498               | 0.3041             |
| cg04908300              | 0.3904               | 0.3120             |
| cg18537222              | 0.4706               | 0.4162             |
| cg21859053              | 0.3835               | 0.4882             |
| cg13518792              | 0.5413               | 0.4943             |
| cg09405169              | 0.2839               | 0.5445             |
| cg04632671              | 0.4008               | 0.5617             |
| cg18887186              | 0.8130               | 0.5836             |
| cg21946299              | 0.6694               | 0.6093             |
| cg07676920              | 0.7375               | 0.6477             |
| cg07895576              | 0.9847               | 0.6684             |
| cg23514324              | 0.7392               | 0.6848             |
| cg15722404              | 0.6541               | 0.7118             |

| Gene, methylation probe | P value - urinary As | P value - blood As |
|-------------------------|----------------------|--------------------|
| cg04748988              | 0.6119               | 0.7519             |
| cg27095527              | 0.7051               | 0.8231             |
| cg06573644              | 0.8127               | 0.8608             |
| cg16197186              | 0.9182               | 0.8716             |
| cg26364899              | 0.7196               | 0.9826             |
| <b>TP53</b>             |                      |                    |
| cg05479194              | 0.0159*              | 0.0041*            |
| cg02855142              | 0.1444               | 0.0380*            |
| cg08119584              | 0.1719               | 0.0715             |
| cg01620719              | 0.0302*              | 0.0880             |
| cg14351634              | 0.3578               | 0.0976             |
| cg12041075              | 0.2695               | 0.1063             |
| cg18198734              | 0.2135               | 0.1504             |
| cg23290969              | 0.6054               | 0.1553             |
| cg07760161              | 0.2769               | 0.2476             |
| cg17461511              | 0.2342               | 0.2820             |
| cg08691422              | 0.5861               | 0.4257             |
| cg10792831              | 0.3479               | 0.4390             |
| cg12041429              | 0.7084               | 0.4622             |
| cg02087342              | 0.8645               | 0.4877             |
| cg13169780              | 0.5220               | 0.5195             |
| cg25896754              | 0.4858               | 0.5268             |
| cg18311066              | 0.3047               | 0.5419             |
| cg21050342              | 0.3151               | 0.5576             |
| cg22175811              | 0.7993               | 0.5596             |
| cg00807143              | 0.9929               | 0.5612             |
| cg02842899              | 0.5454               | 0.6102             |
| cg02690969              | 0.4763               | 0.6109             |
| cg23846713              | 0.5634               | 0.6233             |
| cg25053252              | 0.5613               | 0.6339             |
| cg07991600              | 0.9171               | 0.6478             |
| cg02045224              | 0.4224               | 0.6671             |
| cg05348746              | 0.9374               | 0.6732             |
| cg15206330              | 0.9310               | 0.6806             |
| cg13468400              | 0.3761               | 0.6845             |
| cg22949073              | 0.9418               | 0.6931             |
| cg04009932              | 0.6909               | 0.7016             |
| cg12373934              | 0.5787               | 0.7976             |
| cg26539663              | 0.8796               | 0.8186             |
| cg16397722              | 0.7196               | 0.8489             |
| cg06317056              | 0.6082               | 0.8640             |
| cg02166782              | 0.7802               | 0.9041             |
| cg16203911              | 0.6957               | 0.9307             |
| cg06365412              | 0.6289               | 0.9528             |
| cg06587969              | 0.6854               | 0.9997             |

| Gene, methylation probe | P value - urinary As | P value - blood As |
|-------------------------|----------------------|--------------------|
| <b>MHL1</b>             |                      |                    |
| cg11291081              | 0.0078*              | 0.0451*            |
| cg04777024              | 0.0348*              | 0.0478*            |
| cg05670953              | 0.0041*              | 0.0540             |
| cg12851504              | 0.4298               | 0.0652             |
| cg13846866              | 0.1836               | 0.0914             |
| cg10769891              | 0.2819               | 0.1402             |
| cg19132762              | 0.1321               | 0.1459             |
| cg17024523              | 0.0749               | 0.1473             |
| cg05845319              | 0.2701               | 0.1596             |
| cg11600697              | 0.2947               | 0.2026             |
| cg01302270              | 0.2725               | 0.2052             |
| cg10990993              | 0.7643               | 0.2168             |
| cg27586588              | 0.4999               | 0.2330             |
| cg16433211              | 0.8920               | 0.2390             |
| cg14671526              | 0.6122               | 0.2890             |
| cg05906740              | 0.4453               | 0.2945             |
| cg11363877              | 0.4166               | 0.3540             |
| cg14598950              | 0.4289               | 0.3762             |
| cg24607398              | 0.8110               | 0.4007             |
| cg17641046              | 0.7081               | 0.4141             |
| cg14751544              | 0.7281               | 0.4238             |
| cg02279071              | 0.9145               | 0.4251             |
| cg21109167              | 0.1755               | 0.4293             |
| cg16764580              | 0.6471               | 0.4360             |
| cg03497419              | 0.3112               | 0.4594             |
| cg27331401              | 0.9758               | 0.4791             |
| cg00893636              | 0.4995               | 0.5158             |
| cg03192963              | 0.6067               | 0.5474             |
| cg23658326              | 0.7797               | 0.5515             |
| cg25837710              | 0.2331               | 0.5745             |
| cg03405026              | 0.6626               | 0.5762             |
| cg11224603              | 0.7240               | 0.6162             |
| cg21490561              | 0.5565               | 0.6211             |
| cg07064226              | 0.7734               | 0.6725             |
| cg16863190              | 0.8385               | 0.6744             |
| cg25202636              | 0.4074               | 0.6747             |
| cg25212762              | 0.6925               | 0.6984             |
| cg07101782              | 0.9040               | 0.7073             |
| cg02103401              | 0.8289               | 0.7500             |
| cg06791151              | 0.3299               | 0.7509             |
| cg06108510              | 0.8743               | 0.7683             |
| cg24985459              | 0.8298               | 0.7955             |
| cg18320188              | 0.3373               | 0.8303             |
| cg04726821              | 0.3231               | 0.8356             |
| cg04841293              | 0.8882               | 0.8640             |

| <b>Gene, methylation probe</b> | <b>P value - urinary As</b> | <b>P value - blood As</b> |
|--------------------------------|-----------------------------|---------------------------|
| cg17621259                     | 0.8063                      | 0.9192                    |
| cg06590608                     | 0.9778                      | 0.9195                    |
| cg19208331                     | 0.7827                      | 0.9366                    |
| cg12790037                     | 0.7714                      | 0.9387                    |
| cg03901257                     | 0.8891                      | 0.9540                    |

\*P<0.05.



## References

- Kile ML, Houseman EA, Baccarelli A, Quamruzzaman Q, Rahman M, Mostofa G, et al. 2014. Effect of prenatal arsenic exposure on DNA methylation and leukocyte subpopulations in cord blood. *Epigenetics* 9:774-782.
- Koestler DC, Avissar-Whiting M, Houseman EA, Karagas MR, Marsit CJ. 2013a. Differential DNA methylation in umbilical cord blood of infants exposed to low levels of arsenic in utero. *Environ Health Perspect* 121:971-977.
- Liu X, Zheng Y, Zhang W, Zhang X, Liloyd-Jones DM, Baccarelli AA, et al. 2014. Blood methylomics in response to arsenic exposure in a low-exposed us population. *J Expo Sci Environ Epidemiol* 24:145-149.
- Seow WJ, Kile ML, Baccarelli AA, Pan WC, Byun HM, Mostofa G, et al. 2014. Epigenome-wide DNA methylation changes with development of arsenic-induced skin lesions in Bangladesh: a case-control follow-up study. *Environ Mol Mutagen* 55:449-456.
- Yang TY, Hsu LI, Chiu AW, Pu YS, Wang SH, Liao YT, et al. 2014. Comparison of genome-wide DNA methylation in urothelial carcinomas of patients with and without arsenic exposure. *Environ Res* 128:57-63.
